# Supplementary material for: Functional and proteomic analysis of Ceratonova shasta (Cnidaria: Myxozoa) polar capsules reveals adaptations to parasitism
Source: PubMed Central journal article supplement (PMC5566210; doi:10.1038/s41598-017-09955-y), 2017-08-21
Supplement: 41598_2017_9955_MOESM4_ESM.pdf [file 41598_2017_9955_MOESM4_ESM.pdf]

## **Functional and proteomic analysis of *Ceratonova shasta* (Cnidaria: Myxozoa) polar capsules reveals adaptations to parasitism**

Gadi Piriatskiy<sup>1</sup>, Stephen D. Atkinson<sup>2</sup>, Sinwook Park<sup>3</sup>, David Morgenstern<sup>1</sup>, Vera Brekhman<sup>1</sup>, Gilad Yossifon<sup>3</sup>, Jerri L. Bartholomew<sup>2</sup> and Tamar Lotan<sup>1\*</sup>

### **Supplementary Information:**

**Figure S1.** *C. shasta* nematogalectins phylogenetic tree.

**Figure S2.** *C. shasta* minicollagen phylogenetic tree

**Table S1.** (excel file) List of proteins identified in the study including annotation, proteomic data and sequences

**Table S2.** (excel file) InterPro domain analysis of *C. shasta*, Anemonia, Aurelia and Hydra

**Video 1.** Polar capsules separation process on the DEP-chip platform

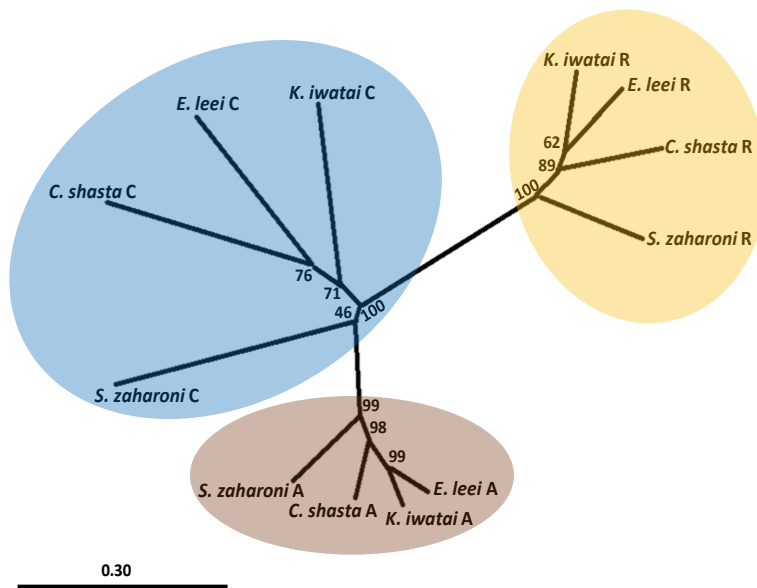

**Figure S1. *C. shasta* nematogalectins phylogenetic tree.** Neighbor-joining phylogenetic tree based on myxozoan nematogalectin types A, C and R (Related) sequences. Bootstrap = 10K. NCBI accession numbers: *E. leei*: nematogalectin A - CDU32397, nematogalectin C - CDU32398, nematogalectin R - CDU32399; *K. iwatai*: nematogalectin A - CDU32395, nematogalectin C - CDU32394, nematogalectin R - CDU32396; *S. zaharoni*: nematogalectin A - CDU32392, nematogalectin C - CDU32393, nematogalectin R - CDU32391.

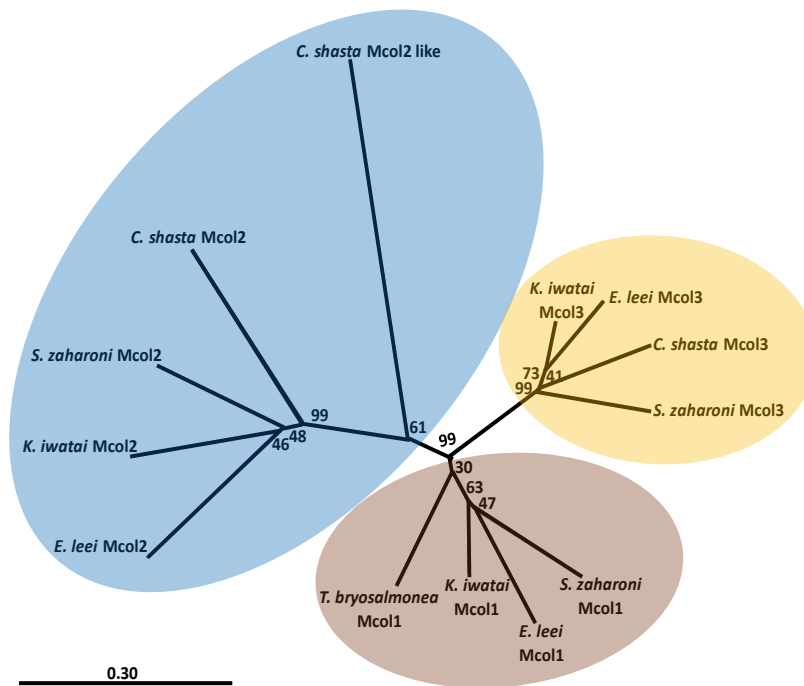

**Figure S2. *C. shasta* minicollagen phylogenetic tree.** Neighbor joining phylogenetic tree based on myxozoan minicollagens (Mcol) types 1, 2 and 3. Bootstrap = 10K. NCBI accession numbers: *E. leei*: Mcol1 - CDU32385, Mcol2 - CDU32386, Mcol3 - CDU32387; *K. iwatai*: Mcol1 - CDU32382, Mcol2 - CDU32383, Mcol3 - CDU32384; *S. zaharoni*: Mcol1 - CDU32388, Mcol2 - CDU3239, Mcol3 - CDU32390; *T. bryosalmonae* Mcol1 - CBJ19443.
